# Supplementary material for: Toxoplasma gondii in beef consumed in France: regional variation in seroprevalence and parasite isolation
Source: PubMed Central journal article supplement (PMC6927255; doi:10.1051/parasite/2019076), 2019-12-23
Supplement: parasite-26-77-olm.pdf [file parasite-26-77-olm.pdf]

| Age (months)                 | Number of collected (bioassay) samples | Number of collected (bioassay) samples with terminal titer of : |        |          |         |      |      |      |      |
|------------------------------|----------------------------------------|-----------------------------------------------------------------|--------|----------|---------|------|------|------|------|
|                              |                                        | 0                                                               | 6      | 10       | 25      | 50   | 100  | 200  | 400  |
| < 8                          | 574 (10)                               | 535(3)                                                          | 25(4)  | 6(1)     | 4(1)    | 3(0) | 1(1) | 0(0) | 0(0) |
| 8-12                         | 33(3)                                  | 29(0)                                                           | 2(1)   | 1(1)**   | 1(1)    | 0(0) | 0(0) | 0(0) | 0(0) |
| 13-24                        | 602(44)                                | 472(1)                                                          | 88(13) | 15(12)   | 22(15)  | 2(0) | 2(2) | 1(1) | 0(0) |
| 25-36                        | 232(28)                                | 178(1)                                                          | 25(3)  | 16(12)   | 8(8)    | 3(3) | 2(1) | 0(0) | 0(0) |
| 37-48                        | 207(29)                                | 143(1)                                                          | 40(6)  | 11(9)    | 5(5)    | 2(2) | 3(3) | 3(3) | 0(0) |
| 49-60                        | 144(16)                                | 107(0)                                                          | 24(4)  | 6(5)     | 3(3)*** | 3(3) | 0(0) | 1(1) | 0(0) |
| 61-72                        | 122(11)                                | 98(0)                                                           | 14(3)  | 5(3)     | 3(3)    | 0(0) | 1(1) | 1(1) | 0(0) |
| 73-84                        | 88(11)                                 | 64(2)                                                           | 18(4)  | 4(4)**   | 0(0)    | 0(0) | 1(1) | 1(0) | 0(0) |
| 85-96                        | 110(21)                                | 70(0)                                                           | 21(6)  | 12(9)*** | 4(4)    | 1(1) | 1(0) | 0(0) | 1(1) |
| 97-108                       | 65(10)                                 | 49(0)                                                           | 5(1)   | 6(5)     | 3(3)    | 0(0) | 1(0) | 1(1) | 0(0) |
| 109-120                      | 47(8)                                  | 32(1)                                                           | 9(1)   | 4(4)     | 2(2)    | 0(0) | 0(0) | 0(0) | 0(0) |
| 121-132                      | 40(7)                                  | 27(0)                                                           | 7(1)   | 5(5)**   | 1(1)**  | 0(0) | 0(0) | 0(0) | 0(0) |
| 133-144                      | 28(4)                                  | 19(0)                                                           | 5(1)   | 3(2)     | 0(0)    | 1(1) | 0(0) | 0(0) | 0(0) |
| 145-156                      | 12(3)                                  | 9(0)                                                            | 3(3)   | 0(0)     | 0(0)    | 0(0) | 0(0) | 0(0) | 0(0) |
| 157-168                      | 12(2)                                  | 8(0)                                                            | 3(1)   | 1(1)     | 0(0)    | 0(0) | 0(0) | 0(0) | 0(0) |
| 169-180                      | 7(0)                                   | 6(0)                                                            | 1(0)   | 0(0)     | 0(0)    | 0(0) | 0(0) | 0(0) | 0(0) |
| 181-192                      | 4(1)                                   | 3(0)                                                            | 0(0)   | 1(1)     | 0(0)    | 0(0) | 0(0) | 0(0) | 0(0) |
| 193-204                      | 4(0)                                   | 4(0)                                                            | 0(0)   | 0(0)     | 0(0)    | 0(0) | 0(0) | 0(0) | 0(0) |
| >205                         | 6(1)                                   | 5(0)                                                            | 1(1)   | 0(0)     | 0(0)    | 0(0) | 0(0) | 0(0) | 0(0) |
| Adults without mentioned age | 11(0)                                  | 11(0)                                                           | 0(0)   | 0(0)     | 0(0)    | 0(0) | 0(0) | 0(0) | 0(0) |
| TOTAL                        | 2349*(209)                             |                                                                 |        |          |         |      |      |      |      |

\* One animal without indication (adult/calf)

\*\* All 3 mice died in 48h p.i.

\*\*\* Positive sample in bioassay

**Table 1: Number of collected/bioassayed samples of French origin, according to the terminal titer and the age of animals.**
